# Supplementary material
Source: PubMed Central journal article supplement (PMC2719370)

**Supplemental Figure 1. Intramitochondrial localization of imported CYPs in wild type and *tom22*Δ mitochondria.** <sup>35</sup>S-labeled proteins (+33/1A1 (A), +5/1A1 (B), 2B1 (C), 2E1 (D), CYP27A1 (E)) were incubated with mitochondria from wild-type yeast strain. Following the import mitochondria were sequentially treated with digitonin (75 μg/mg protein) and trypsin respectively. Next these mitochondria were subjected to sodium carbonate extraction to investigate the membrane association of imported CYPs. In figures F and G, <sup>35</sup>S-labeled proteins (+33/1A1 (F), 2E1 (G)) were incubated with wild type and *tom22*Δ mitochondria either in the presence or absence of CCCP (50 μM). Then mitochondria were subjected to trypsin treatment. In a parallel experiment +33/1A1 (F) and 2E1 (G) were incubated with *tom22*Δ mitochondria in the absence of CCCP. Following the incubation, mitochondria were re-isolated, and subjected to sodium carbonate extraction. Detection of <sup>35</sup>S labeled proteins (in Figs. A-G) was carried out by SDS-PAGE and fluorography. p, precursor and m, mature protein. In Figs. F & G indicates the shorter protected fragment.

# Supplemental Figure 1

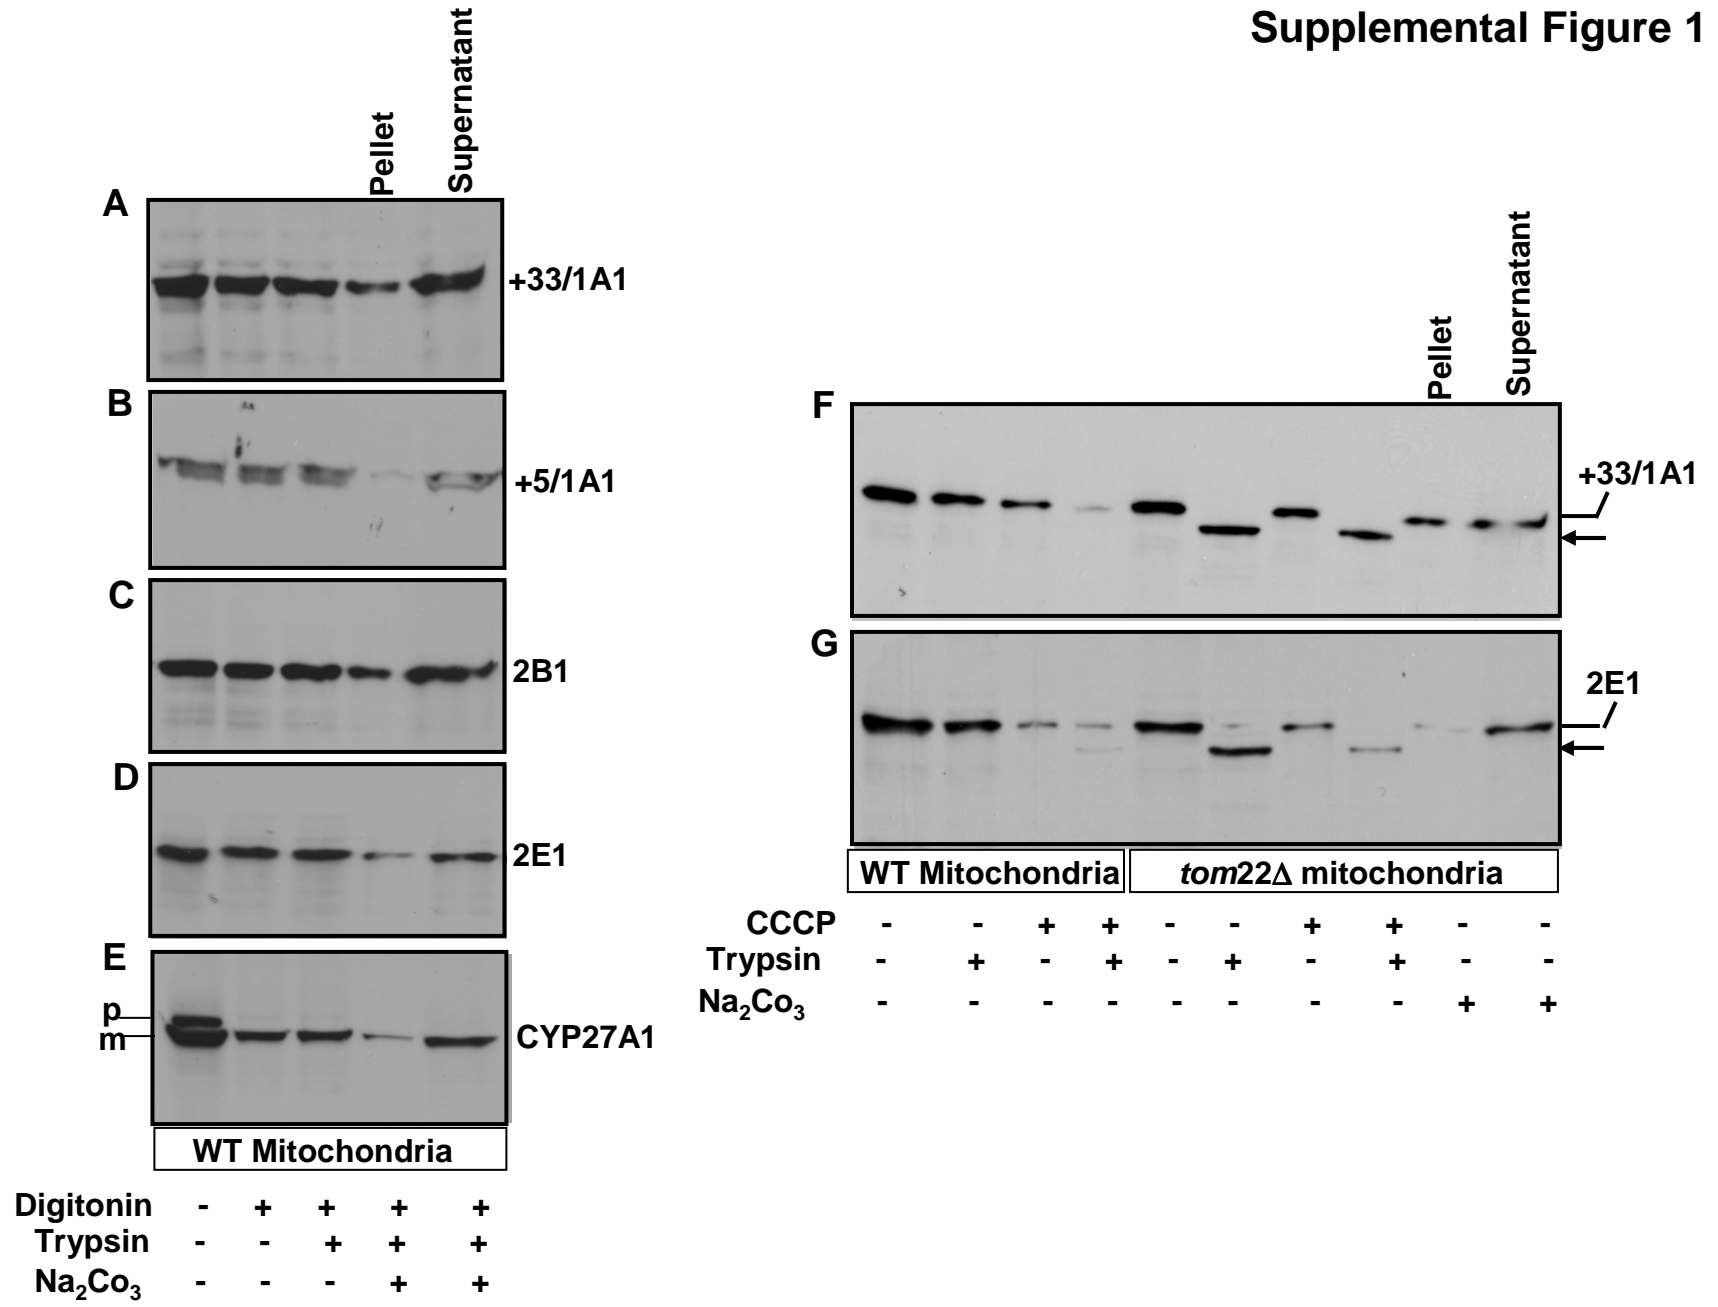

Supplement: M109.007492_1.pdf [file M109.007492_1.pdf]
